# Supplementary material
Source: PubMed Central journal article supplement (PMC4510193)
Supplement: AEM.00278-15_zam999116449so1.pdf [file AEM.00278-15_zam999116449so1.pdf]

## SUPPLEMENTAL MATERIAL

### ***SnPKS19* encodes the polyketide synthase for alternariol mycotoxin biosynthesis in the wheat pathogen *Parastagonospora nodorum***

Yit-Heng Chooi,<sup>a,b</sup># Jordi Mariano Muria-Gonzalez,<sup>a</sup> Oliver L. Mead,<sup>a</sup>  
Peter S. Solomon<sup>a</sup>

Plant Sciences Division, Research School of Biology, The Australian National University, Canberra, Australian Capital Territory, Australia<sup>a</sup>;  
School of Chemistry and Biochemistry, University of Western Australia, Crawley, Western Australia, Australia<sup>b</sup>

Running Head: Alternariol synthase from *Parastagonospora nodorum*

#Address correspondence to Yit-Heng Chooi, [yitheng.chooi@uwa.edu](mailto:yitheng.chooi@uwa.edu)

## Table of Contents

|                                                                                          | Pages |
|------------------------------------------------------------------------------------------|-------|
| <b>Supplemental Methods</b>                                                              |       |
| Detection of AOH and AME in various growth conditions .....                              | S2    |
| Phytotoxicity, antigerminative and antibacterial activity assays .....                   | S3    |
| <b>Supplemental Tables</b>                                                               |       |
| <b>Table S1.</b> Primers used in this study .....                                        | S4    |
| <b>Table S2.</b> KS domain sequences included in the phylogenetic analysis.....          | S5    |
| <b>Supplemental Methods</b>                                                              |       |
| <b>Figure S1.</b> Detection of AOH in different growth conditions by LC-QToF/MS.....     | S7    |
| <b>Figure S2.</b> Gene-expression profile of <i>P. nodorum</i> SnPKS19 gene cluster..... | S8    |
| <b>Figure S3.</b> <i>SnPKS19</i> knockout scheme and diagnostic PCR .....                | S9    |
| <b>Figure S4.</b> Southern blot confirmation of <i>SnPKS19</i> knockout .....            | S10   |
| <b>Figure S5.</b> Comparison of the gene structure of the revised <i>SnPKS19</i> .....   | S10   |
| <b>Figure S6.</b> Reverse-transcriptase PCR of <i>SnPKS19</i> and <i>pkgA/B</i> .....    | S11   |
| <b>Figure S7.</b> Wheat detached leaf assay and phytotoxicity assay .....                | S11   |
| <b>Supplemental References</b>                                                           | S12   |

## SUPPLEMENTAL METHODS

### Detection of alternariol (AOH) in various growth conditions

To achieve higher sensitivity for detection of AOH and AME in various growth conditions, LC-QToF/MS was used for the metabolite analyses. *P. nodorum* SN15 was grown in modified Fries liquid medium (30 g sucrose, 5 g ammonium tartrate, 1 g NH<sub>4</sub>NO<sub>3</sub>, 1 g KH<sub>2</sub>PO<sub>4</sub>, 0.5 g MgSO<sub>4</sub>·7H<sub>2</sub>O, 0.13 g CaCl<sub>2</sub>, 0.1 g NaCl) (1) in the dark at 22°C with shaking at 125 rpm for 15 days. Mycelia from the Fries liquid medium cultures were lyophilized and then macerated in EtOAc to extract the metabolites. The extracts were vacuum filtered, dried *in vacuo* and resuspended in MeOH for metabolite analysis.

We used both detached leaf assays (DLA) and wheat glume infection assays to screen for AOH and AME production *in planta*. For DLA, leaves from 10-day-old seedlings were cut into 5 cm segments. The leaf segment tips were embedded in water-agar + 0.3% benzimidazole petri dishes forming bridges. Three droplets of 5µl of spore solution at 1 × 10<sup>6</sup> spores/ml in 0.2% Tween 20 were placed on the surface of the leaf bridges. Petri dishes containing the inoculated leaves were sealed with Parafilm® and incubated at 22°C in a 12 hour light/dark cycle. The infected leaves were harvested 10 days after initial inoculation and extracted with EtOAc, dried *in vacuo* and resuspended in MeOH for metabolite analysis. For glume infection assays, wheat heads of 55-day-old wheat plants were inoculated with solution containing 2 × 10<sup>6</sup> spores/ml in 0.2% of Tween 20. The inoculated plants were watered for another 22 days and the seeds were collected after 10 days from when the watering stopped. To confirm successful infection of the wheat seeds, a small sample of wheat seeds were surfaced-sterilized and placed on tap water agar for re-isolation of the *P. nodorum* SN15 strain. The infected seeds were extracted with EtOAc, dried *in vacuo* and resuspended in MeOH for metabolite analysis.

LC-QToF/MS analysis was performed on an Agilent 1200 LC coupled to an Agilent 6520 quadrupole time-of-flight (QToF) system with Jetstream electrospray ionization (ESI) source. A 1µg/ml AOH and AME in MeOH was prepared from the 100µg/ml commercial standards (LGC standards) to be run by LC-MS. Chromatographic analyses were performed using a ZORBAX Eclipse XDB-C18 RRHD (2.1x150mm, 1.8µm) column at 40°C. The gradient employed was: 2-10% B over 10 min, 10-25% B over 20 min, 50% B over 25 min 70% B over 30 min, 70% over 20min at a 200µl/min flow using H<sub>2</sub>O + 0.5% formic acid (HF) as solvent A and 90% MeCN in water + 0.5% HF as solvent B. The injection volume for all

runs was 5  $\mu$ l. The data were collected in the  $m/z$  range 100–1000 amu in positive mode. Results were processed with the Mass Hunter Workstation Qualitative Analysis B.04.00 software (Agilent).

### **Phytotoxicity, antigerminative and antibacterial activity assays**

The phytotoxicity of AOH (Cayman Chemical) was assayed on the leaves of 11 day-old wheat seedlings that were grown at 22°C under a 12 h light/dark cycle regime, as described previously (2). Briefly, approximately 100  $\mu$ L of each compound in 2% MeOH solution was infiltrated on the adaxial face of leaves at 50 and 100  $\mu$ g/mL concentrations using a 1 mL volume syringe. Experiments were performed in six replicates and the infiltrated leaves were examined for the presence of necrosis or chlorosis after 24, 48 and 72 hours.

The ability of AOH to inhibit seed germination was assayed as described previously (2). Briefly, seeds of wheat (*Triticum aestivum* cv. Grandin) and Barrel medic (*Medicago truncatula* cv. Jemalong A17) are first surface-sterilized briefly in a solution containing 10% ethanol and 1% hydrogen peroxide. A single grain of the surface-sterilized seed was then placed on agar slants consist of 1.5 ml of tap water agar supplemented with either AOH and AME at 100  $\mu$ g/mL final concentration (agar containing 2% methanol is used as control). The assays were performed in triplicates and the progress of seed germinations were observed and recorded for one week.

The antimicrobial activity of AOH was tested against *Escherichia coli*, *Saccharomyces cerevisiae*, *Zymoseptoria tritici*, and three environmental bacterial strains isolated from field wheat samples (*Bacillus cereus*, *Flavobacterium* sp. and *Sphingobacterium multivorum*). The antimicrobial activity was performed in 96 well plates with decreasing concentration of AOH (media containing 2% methanol was used as control). Bacteria were grown in lysogeny broth (LB), *Z. tritici* in potato dextrose broth (PDB), and *S. cerevisiae* in yeast peptone dextrose (YPD). Each well contains  $0.5 \times 10^4$  cells or spores. The final concentrations of AOH in the wells were 200, 100, 50, 25, 12.5, 6.75, 3.37, and 1.65  $\mu$ g/ml. The plates were incubated at 28 °C for *S. cerevisiae*, *Bacillus cereus* and *S. multivorum*, 22°C for *Z. tritici*, 37 °C for *E. coli* and *Flavobacterium* sp. The 96-well plates were observed daily until the cultures in control wells were growing.

**SUPPLEMENTAL TABLES****Table S1.** Primers used in this study.

| <b>Primer name</b> | <b>Sequence (5' to 3')</b>                 |
|--------------------|--------------------------------------------|
| GPE1-F             | CATGCGGAGAGACGGACGGAC                      |
| TtrpC-R            | GGTCGAGTGGAGATGTGGAGT                      |
| SnPKS19-KO-P1      | TGTTAGCTAGAATAGGCAGGC                      |
| SnPKS19-KO-P2      | ATTCACTCGTCGTGTCGCCC-GATTTTTTCGAGCCGATCCTC |
| SnPKS19-KO-P3      | ACTCCACATCTCCACTCGACC-AGGCTTGCTTCAACCGTTCT |
| SnPKS19-KO-P4      | GTCCGTCCGTCTCTCCGCATG-CGCAGTTTCATTTGGTATCA |
| SnPKS19-KO-P5      | AATTCACGTCGTGTCGCCC-ATTATAGAGAGTAGTAGAGC   |
| SnPKS19-KO-P6      | GTATAGCGAGCGATACCTAGC                      |
| Hyg-N-R            | AGACGGCGTAACCAAAGTCACA                     |
| Hyg-C-F            | TTCTGGGTAAACGACTCATAGGAGA                  |
| LIC-SnPKS19-F_new  | CTCGTCGTGTCGCCC-ATGACACGGGCCAAAGTTATC      |
| LIC-SnPKS19-R      | CGTCGTGTCGCCCCA-CTATCGAAGCAACGCCTTGAG      |
| SnPKS19-RT-F       | ACATACGCGTGGACCAACAA                       |
| SnPKS19-RT-R       | CCTCGTAGAACACTGTCGCA                       |
| AN7071-RT-F        | CTACTGCACCTGGACTCGTAC                      |
| AN7071-RT-R        | GTATTCCGAGTGCCGTTTGC                       |
| AN7070-RT-F        | GGCTACCTGTGCTCCCAGAA                       |
| AN7070-RT-R        | CAGTGCGTTCTTCTCCTCCA                       |

**Table S2.** KS domain sequences included in the phylogenetic analysis.

| Sequence Name         | GenBank/JGI Protein ID | Organism                                                                         | PKS classification | Polyketide product (if known)                      |
|-----------------------|------------------------|----------------------------------------------------------------------------------|--------------------|----------------------------------------------------|
| Bref-PKS <sup>o</sup> | AIA58899               | <i>Penicillium brefeldianum</i>                                                  | HR-PKS             | Brefeldin precursor                                |
| Fma-PKS <sup>o</sup>  | AGI05041               | <i>Aspergillus fumigatus</i>                                                     | HR-PKS             | fumagillin dodecapentaenoate                       |
| Fum1p <sup>o</sup>    | AAD43562               | <i>Fusarium verticillioides</i>                                                  | HR-PKS             | Fumonisin precursor                                |
| LovF <sup>o</sup>     | AAD34559               | <i>Aspergillus terreus</i>                                                       | HR-PKS             | Lovastatin diketide                                |
| PsoA <sup>o</sup>     | ABS87601               | <i>Aspergillus fumigatus</i>                                                     | PKS-NRPS           | pseurotin A precursor                              |
| CcsA <sup>o</sup>     | EAW09117               | <i>Aspergillus clavatus</i>                                                      | PKS-NRPS           | cytochalasin E/K precursor                         |
| LovB <sup>o</sup>     | AAD39830               | <i>Aspergillus terreus</i>                                                       | HR-PKS             | lovastatin nonaketide                              |
| Gz_PKS13              | ABB90282               | <i>Gibberella zeae</i>                                                           | NR-PKS I           | Zearalenone                                        |
| Hpm3                  | ACD39762               | <i>Hypomyces subiculosus</i>                                                     | NR-PKS I           | Hypothemycin                                       |
| ANID_07909 OrsA       | AAC39471               | <i>Aspergillus nidulans</i>                                                      | NR-PKS I           | Orsellinic acid                                    |
| ANIA_08209 WA         | Q03149                 | <i>Aspergillus nidulans</i>                                                      | NR-PKS III         | Naphthopyrone YWA1                                 |
| Alb1p                 | AAC39471               | <i>Aspergillus fumigatus</i>                                                     | NR-PKS III         | Naphthopyrone YWA1                                 |
| Gz_PKS12              | AAU10633               | <i>Gibberella zeae</i>                                                           | NR-PKS III         | Bikaverin                                          |
| PKSL1                 | Q12053                 | <i>Aspergillus parasiticus</i>                                                   | NR-PKS IV          | Norsolorinic acid                                  |
| ANIA_07825 StcA       | CBF80184               | <i>Aspergillus nidulans</i>                                                      | NR-PKS IV          | Norsolorinic acid                                  |
| CTB1                  | AAT69682               | <i>Cercospora nicotiana</i>                                                      | NR-PKS IV          | Cercosporin precursor                              |
| CIPKS1                | BAA18956               | <i>Colletotrichum lagenarium</i>                                                 | NR-PKS II          | Tetrahydroxy-naphthalene                           |
| GIPKS1                | AAN59953               | <i>Glarea lozoyensis</i>                                                         | NR-PKS II          | Tetrahydroxy-naphthalene                           |
| EdPKS1                | AAD31436               | <i>Exophiala dermatitidis</i>                                                    | NR-PKS II          | Tetrahydroxy-naphthalene                           |
| ANIA_07071 PkgA       | CBF79143               | <i>Aspergillus nidulans</i>                                                      | NR-PKS V           | Citreoisocoumarin, alternariol, other isocoumarins |
| VrtA                  | ADI24926               | <i>Penicillium aethiopicum</i> ( <i>P. lanosocoeruleum</i> )                     | NR-PKS V           | Viridicatumtoxin precursor                         |
| ANIA_06000 AptA       | CBF70387               | <i>Aspergillus nidulans</i>                                                      | NR-PKS V           | Asperthecin                                        |
| AdaA                  | AEN83889               | <i>Aspergillus niger</i>                                                         | NR-PKS V           | TAN-1612                                           |
| PtaA                  | AGO59040               | <i>Pestalotiopsis fici</i>                                                       | NR-PKS V           | Pestheic acid diphenyl precursor                   |
| EncA                  | XP_746435              | <i>Aspergillus fumigatus</i>                                                     | NR-PKS V           | endocrocin                                         |
| Penla1 378863 GsfA    | ADI24953               | <i>Penicillium aethiopicum</i> ( <i>P. lanosocoeruleum</i> ) <sup>E</sup>        | NR-PKS V           | Norlichexanthone                                   |
| <b>SnPKS19</b>        | <b>EAT76667</b>        | <b><i>Parastagonospora nodorum</i> (<i>Stagonospora nodorum</i>)<sup>D</sup></b> | <b>NR-PKS V</b>    | <b>Alternariol</b>                                 |
| PksI                  | AFN68300               | <i>Alternaria alternata</i> <sup>D</sup>                                         | NR-PKS V           | Alternariol?                                       |

**Table S2 (continue).** KS domain sequences included in the phylogenetic analyses.

| Sequence Name | GenBank/JGI Protein ID | Organism                                    | PKS classification | Polyketide product (if known) |
|---------------|------------------------|---------------------------------------------|--------------------|-------------------------------|
| BcPKS14       | CCD48776               | <i>Botrytis cinerea</i> <sup>L</sup>        | NR-PKS V           | Alternariol/norlichexanthone? |
| Zasce1 61908  | 61908 (JGI)            | <i>Zasmidium cellare</i> <sup>D</sup>       | NR-PKS V           | Alternariol/norlichexanthone? |
| Penca1 243077 | 243077 (JGI)           | <i>Penicillium canescens</i> <sup>E</sup>   | NR-PKS V           | Norlichexanthone?             |
| Penra1 289401 | 289401 (JGI)           | <i>Penicillium raistrickii</i> <sup>E</sup> | NR-PKS V           | Norlichexanthone?             |
| Apimo1 217105 | 217105 (JGI)           | <i>Apiospora montagnei</i> <sup>S</sup>     | NR-PKS V           | Norlichexanthone?             |
| Tryvi1 476961 | 476961 (JGI)           | <i>Trypethelium eluteriae</i> <sup>D</sup>  | NR-PKS V           | Alternariol?                  |
| Oidma1 55810  | 55810 (JGI)            | <i>Oidiodendron maius</i> <sup>L</sup>      | NR-PKS V           | Alternariol?                  |
| Penac1 509622 | 509622 (JGI)           | <i>Talaromyces aculeatus</i> <sup>E</sup>   | NR-PKS V           | Alternariol?                  |
| Antav1 394995 | 394995 (JGI)           | <i>Anthostoma avocetta</i> <sup>S</sup>     | NR-PKS V           | Alternariol?                  |

Note: <sup>O</sup> indicates outgroup. <sup>D</sup>, Dothideomycete; <sup>L</sup>, Leotiomycete; <sup>E</sup>, Eurotiomycete; <sup>S</sup>, Sordariomycete.

## SUPPLEMENTAL FIGURES

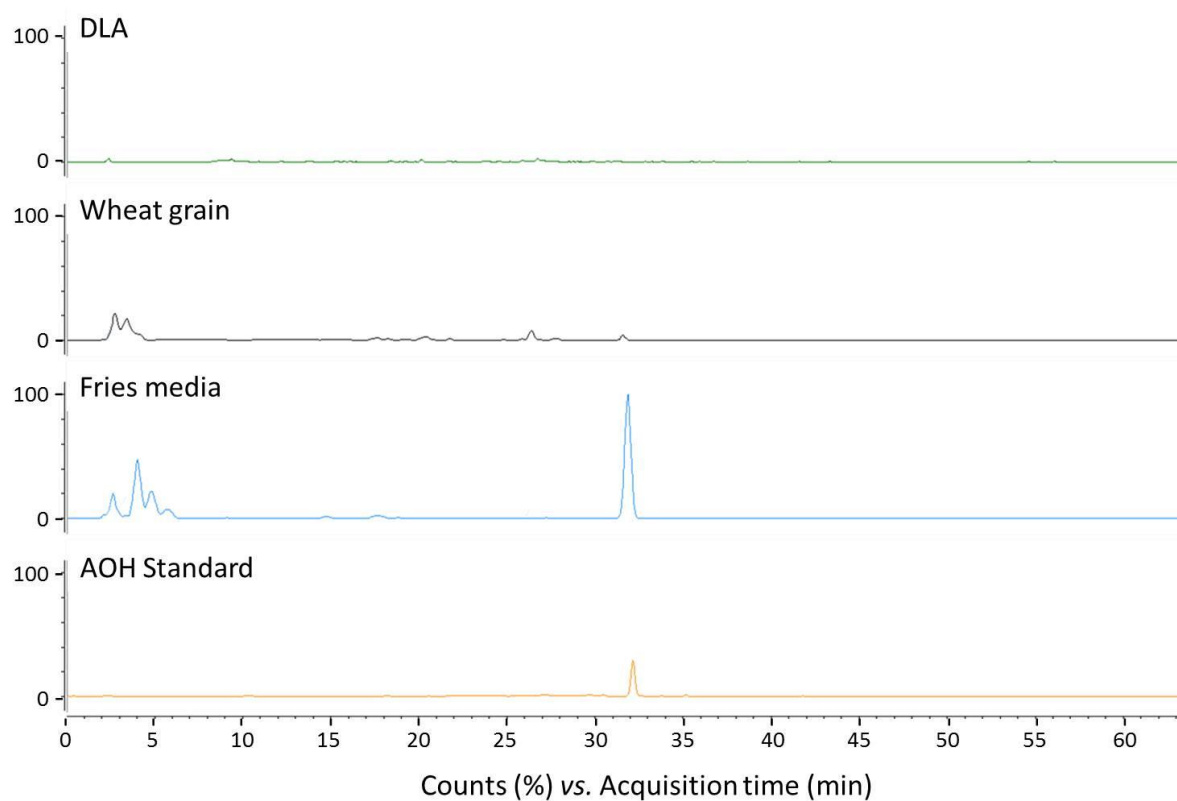

**Figure S1.** Detection of AOH in different growth conditions by LC-QToF/MS. Extracted Ion Chromatograms (EIC) of (AOH+H)<sup>+</sup> ( $m/z=259.06$ ) from detached leaf assays (DLA) of *P. nodorum* SN15 inoculated wheat leaves, SN15 infected wheat grain, SN15 mycelia of modified Fries media cultures and 1  $\mu\text{g/ml}$  AOH standard. AME is not detected in any of the samples above (data not shown).



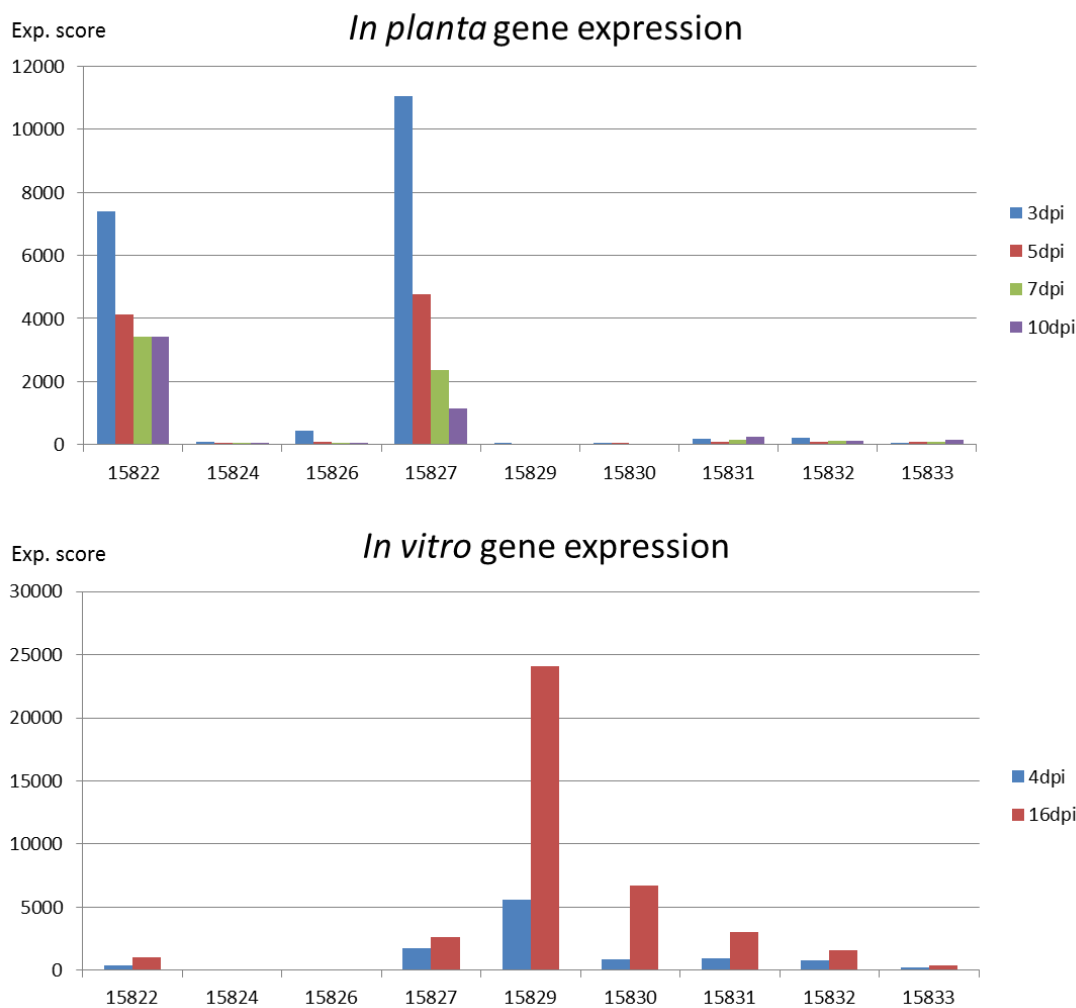

| Gene ID     | Putative function                         |
|-------------|-------------------------------------------|
| SNOG_15822  | cyclohexanone monooxygenase               |
| SNOG_15824  | ABC multidrug transporter                 |
| SNOG_15826  | beta-lactamase                            |
| SNOG_15827  | O-methyltransferase                       |
| SNOG_15829* | alternariol polyketide synthase (SnPKS19) |
| SNOG_15830* | O-methyltransferase                       |
| SNOG_15831* | regulatory protein                        |
| SNOG_15832* | short-chain dehydrogenase                 |
| SNOG_15833  | dioxygenase                               |

\* indicates gene that are co-regulated, i.e. low expression *in planta*, higher expression 16 dpi *in vitro*.

**Figure S2.** Gene-expression profile of *P. nodorum* *SnPKS19* gene cluster during growth *in planta* and *in vitro*. The expression data is extracted from the previous microarray study (3). An expression score of 500 or less essentially means no expression. 50000 or higher is out of the dynamic range (massive expression). dpi - days post inoculation.

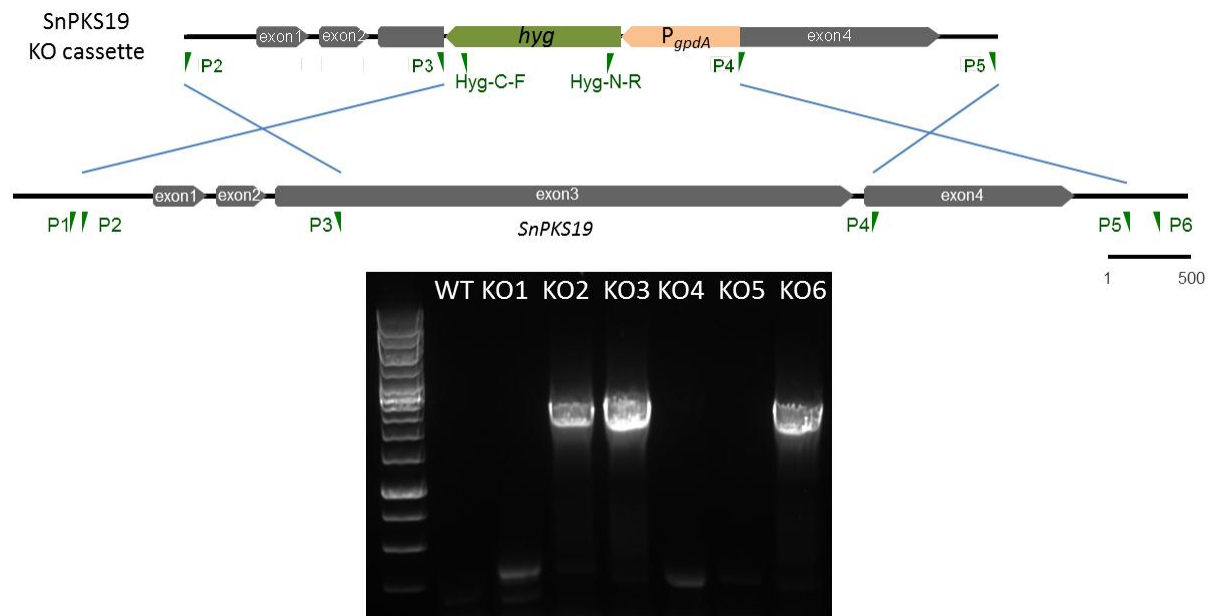

**Figure S3.** *SnPKS19* knockout scheme and diagnostic PCR for confirming *SnPKS19* deletion mutants. P1-P6 correspond to primer binding sites for *SnPKS19*-KO-P1 to -P6 (Table S1). Diagnostic PCR with *SnPKS19*-KO-P1/Hyg-C-F shown here.

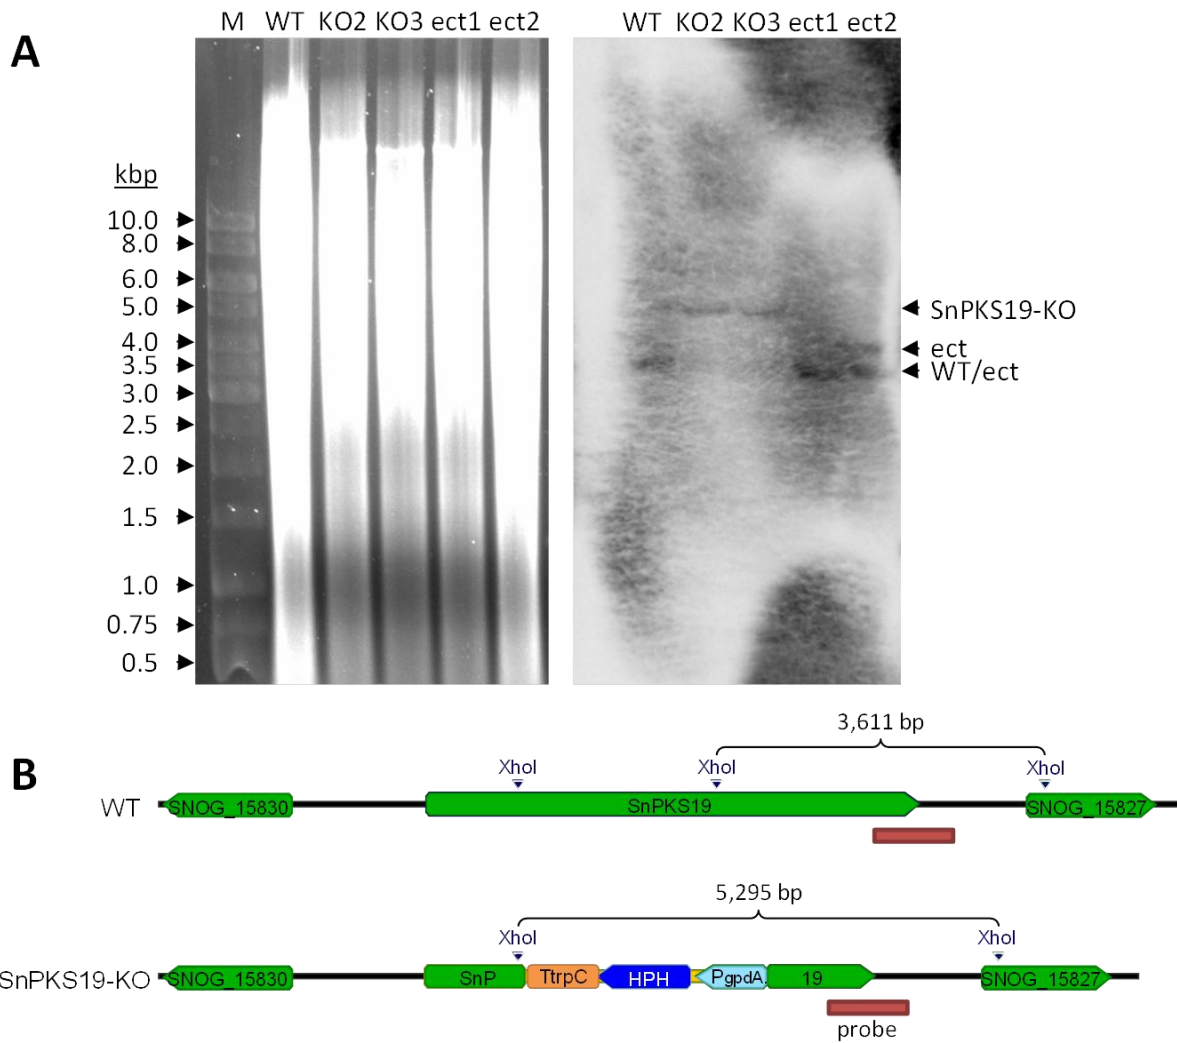

**Figure S4.** Southern blot confirmation of the *SnPKS19* knockout. **(A)** Southern blot with XhoI-digested genomic DNA (7-9 µg). **(B)** Knockout scheme showing the expected size for WT versus *SnPKS19*-KO and the location of the probe.

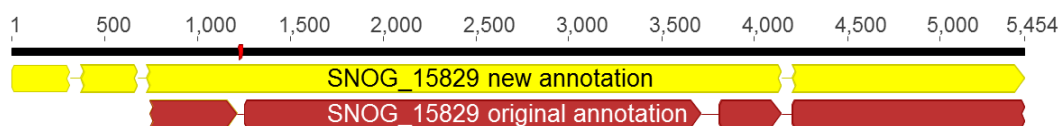

**Figure S5.** Comparison of the gene structure of the revised *SnPKS19* (SNOG\_15829) with the original annotation. The newly revised annotation was deposited in GenBank accession number KP941080.

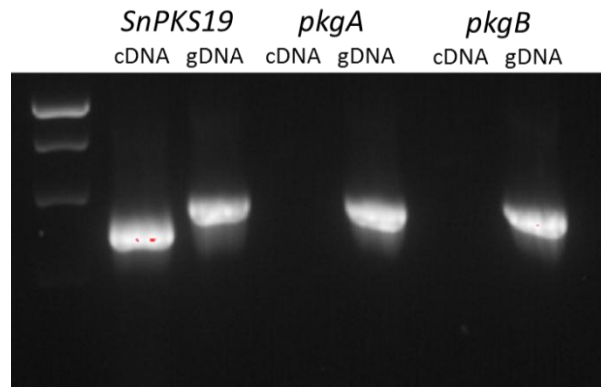

**Figure S6.** Reverse-transcriptase PCR of *SnPKS19* and *pkgA/B*. Primers flanking the last (3' end) intron in the respective genes were used for the PCR/RT-PCR. Product from cDNA is thus expected to be smaller than the gDNA due to intron splicing. The expected size for *SnPKS19* product is 580 bp for gDNA and 520 for cDNA.

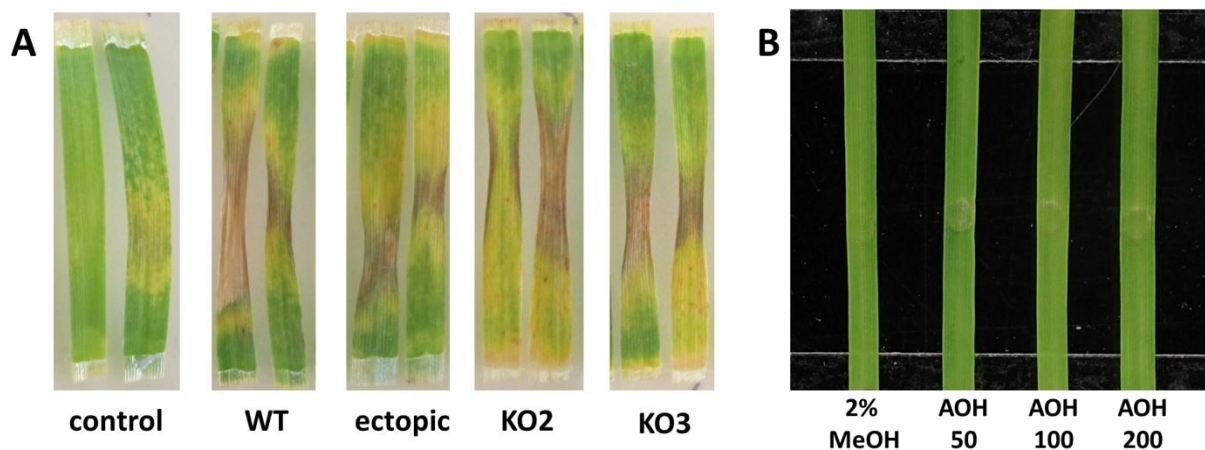

**Figure S7.** Wheat detached leaf assay of *P. nodorum* strains and phytotoxicity assay of alternariol (AOH). (A) Spray inoculated detached wheat leaves on agar, 10 days post inoculation. (B) Phytotoxicity assay of AOH as determined by leaf infiltration with 50, 100 and 200ppm AOH dissolved in 2% MeOH on whole plant wheat seedlings, 72 hours post infiltration. Both experiments were performed in six replicates.

**SUPPLEMENTAL REFERENCES**

1. **Bousquet JF, Skajennikoff M.** 1974. Isolement et mode d'action d'une phytotoxine produite en culture par *Septoria nodorum* Berk. J. Phytopathol. **80**:355-360.
2. **Chooi YH, Krill C, Barrow RA, Chen S, Trengove R, Oliver RP, Solomon PS.** 2014. An in planta-expressed polyketide synthase produces (R)-mellein in the wheat pathogen *Parastagonospora nodorum*. Appl Environ Microbiol.
3. **Ipcho SV, Hane JK, Antoni EA, Ahren D, Henrissat B, Friesen TL, Solomon PS, Oliver RP.** 2012. Transcriptome analysis of *Stagonospora nodorum*: gene models, effectors, metabolism and pantothenate dispensability. Mol Plant Pathol **13**:531-545.
